# Supplementary material
Source: PubMed Central journal article supplement (PMC6005762)
Supplement: NIHMS966336-supplement.pdf [file NIHMS966336-supplement.pdf]

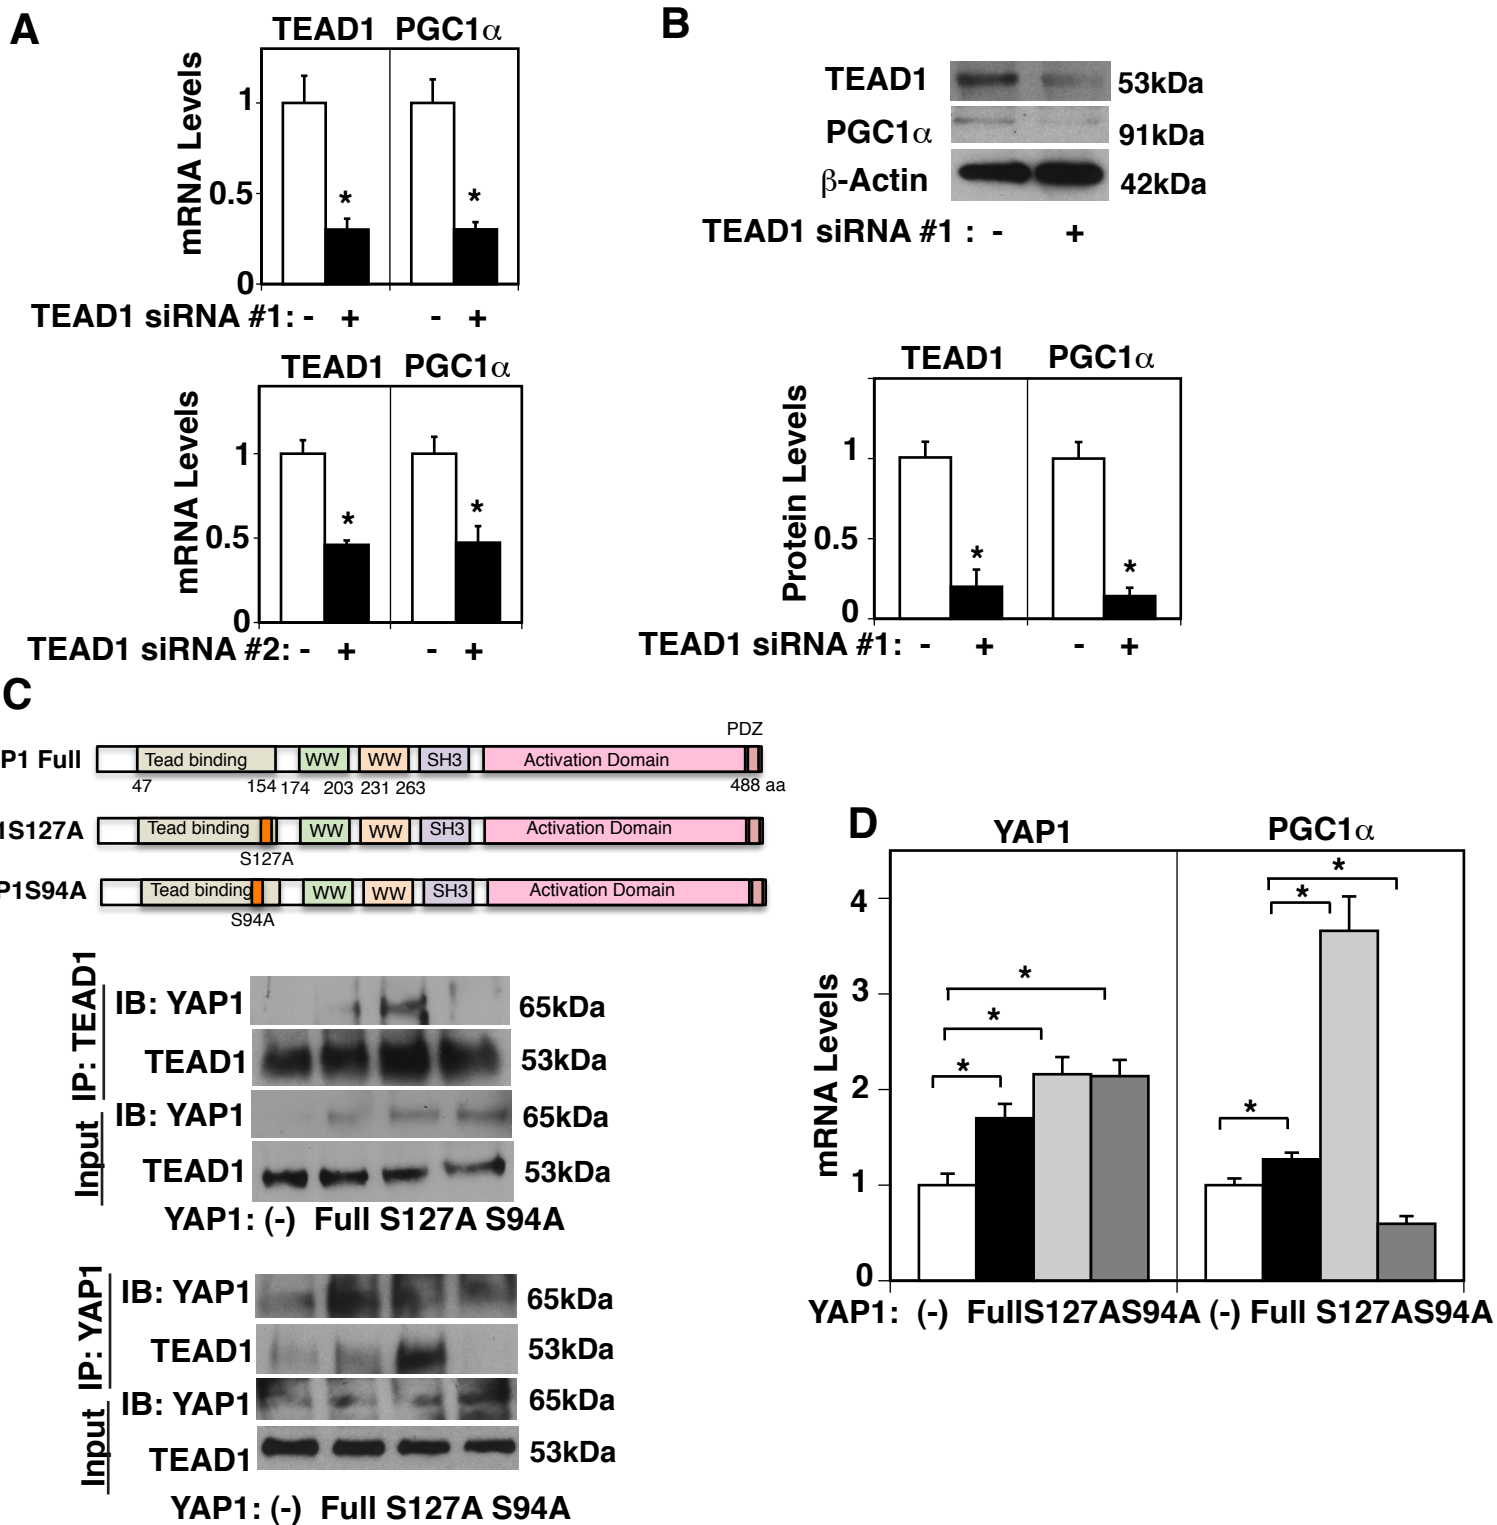

Fig. 1

**A**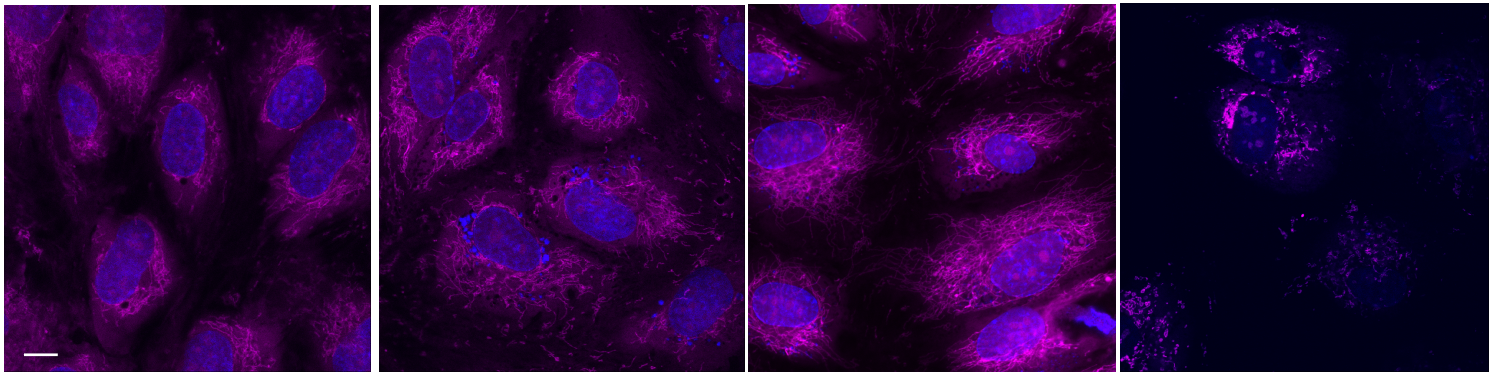

Control

YAP1 Full

YAP1S127A

YAP1S94A

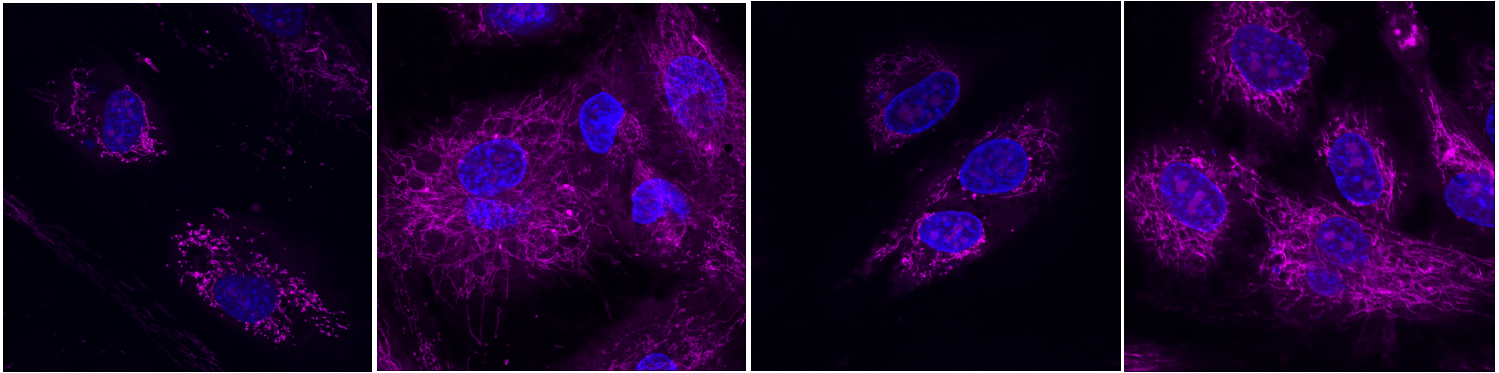PGC1 $\alpha$  siRNAPGC1 $\alpha$  VirusYAP1S127A+  
PGC1 $\alpha$  siRNAYAP1S94A+  
PGC1 $\alpha$  Virus**B**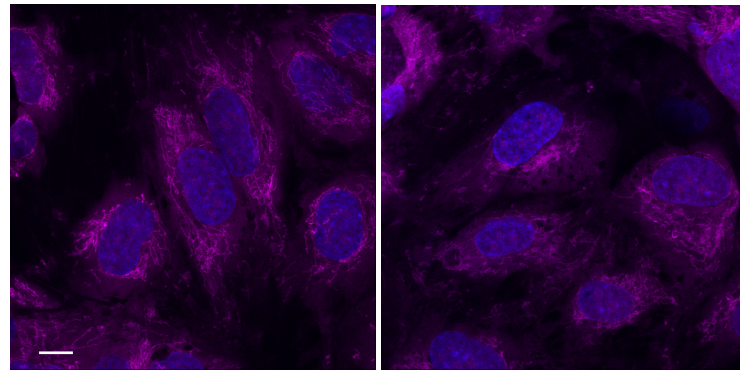

Control siRNA

TEAD1 siRNA

**D**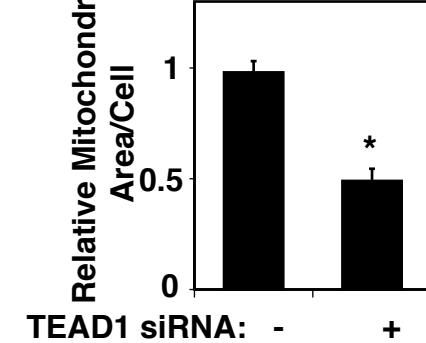

TEAD1 siRNA: - +

**C**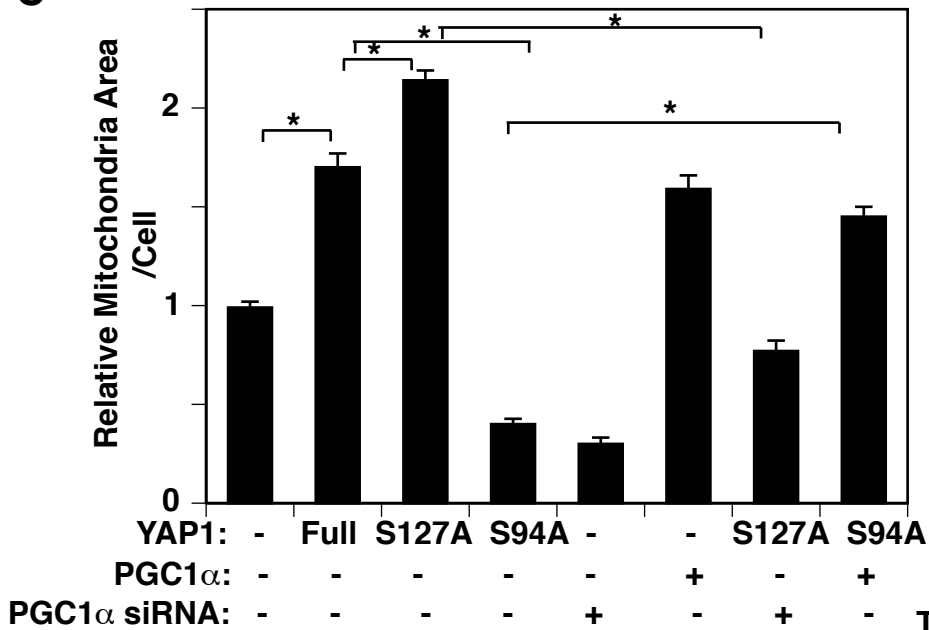**E**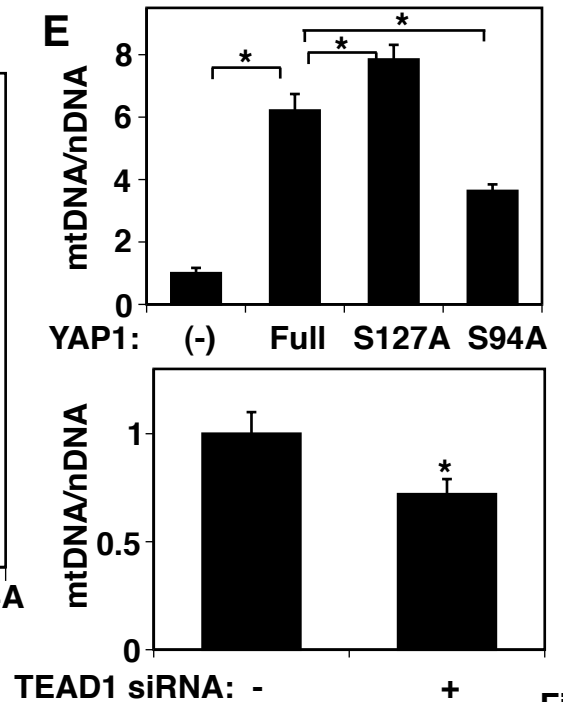

Fig. 2

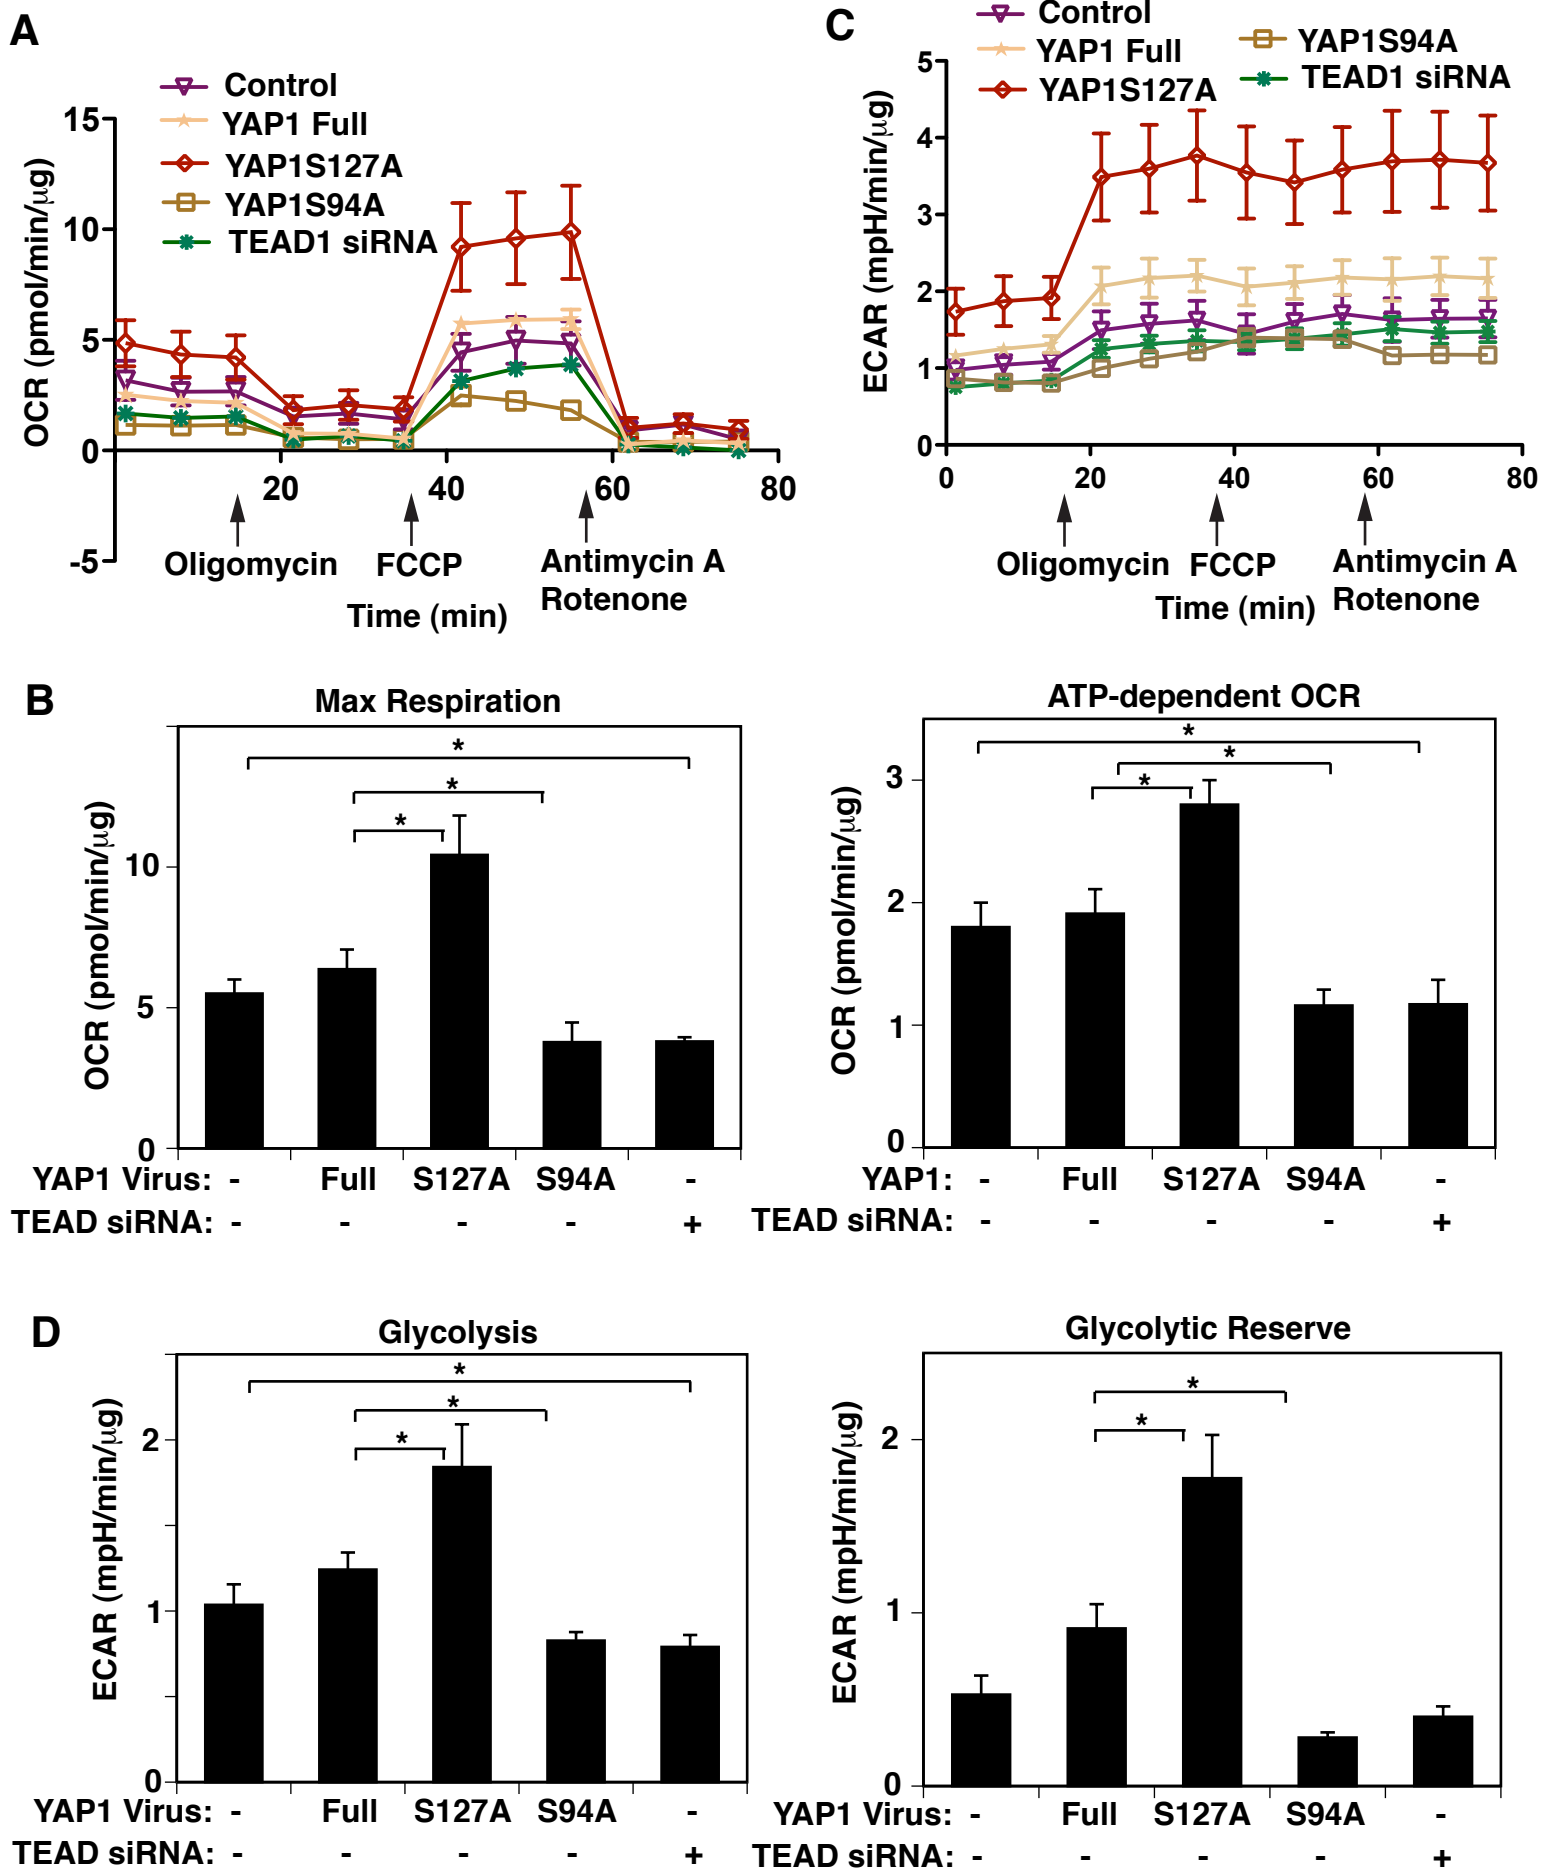

Fig. 3

**A**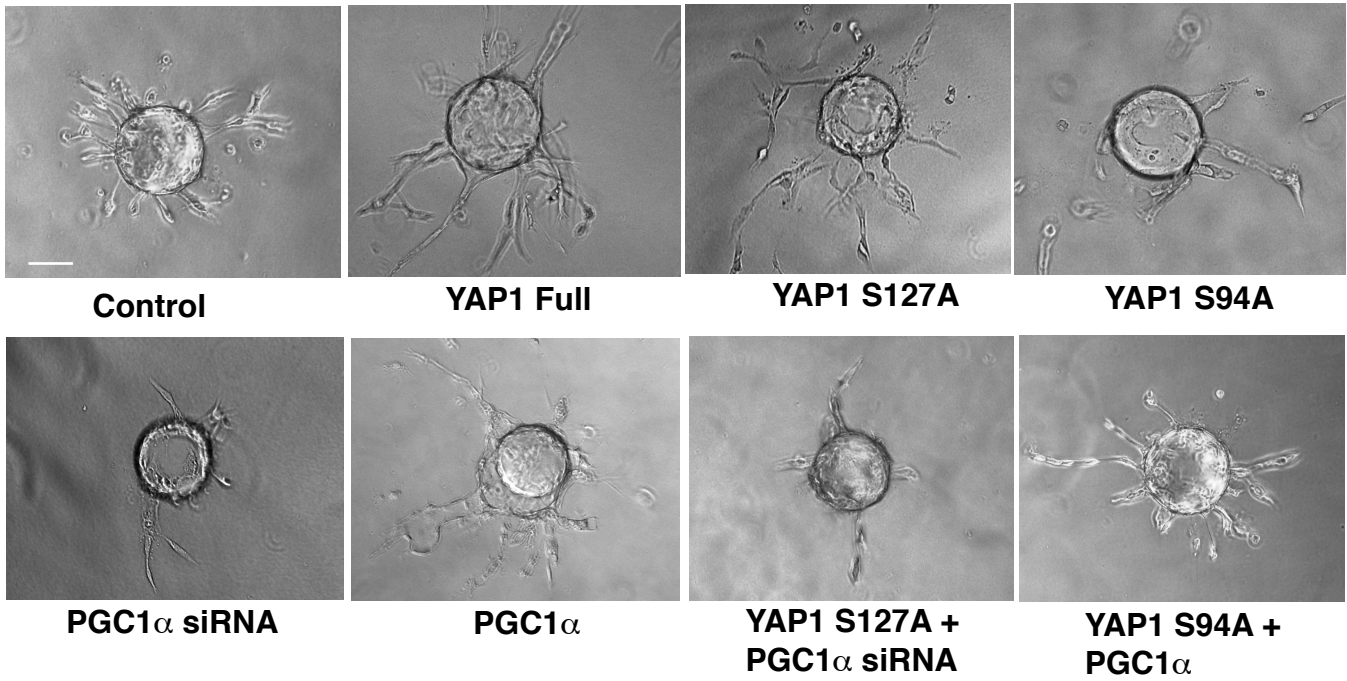**B**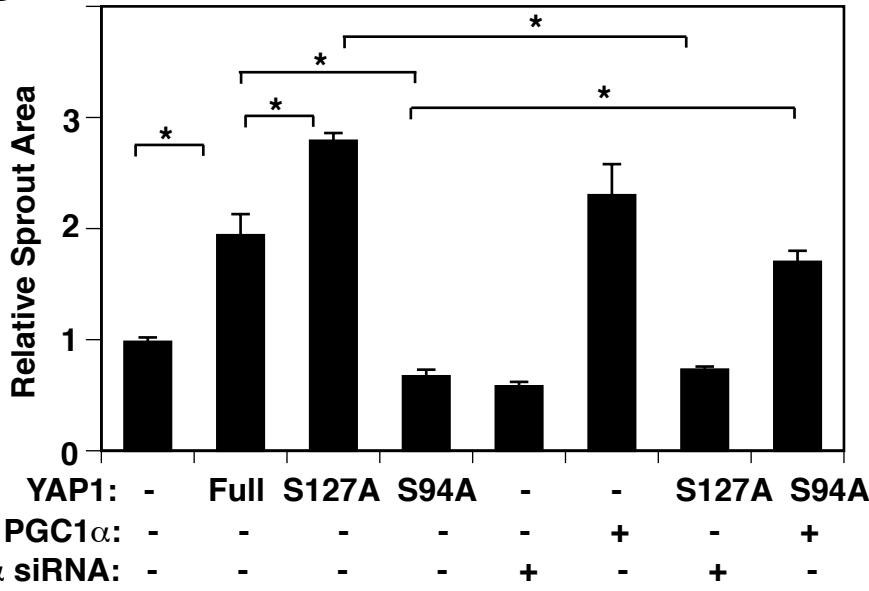**C**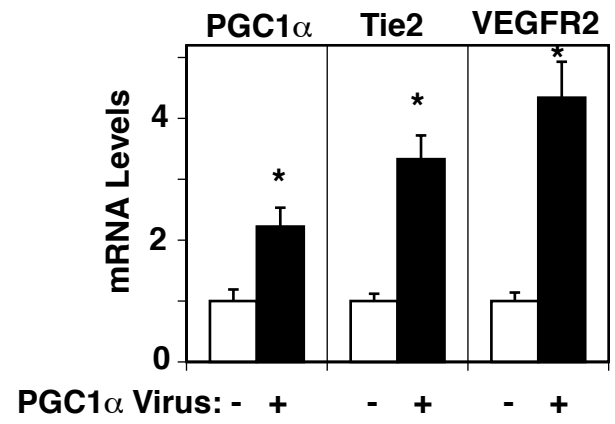**Relative Sprout Length**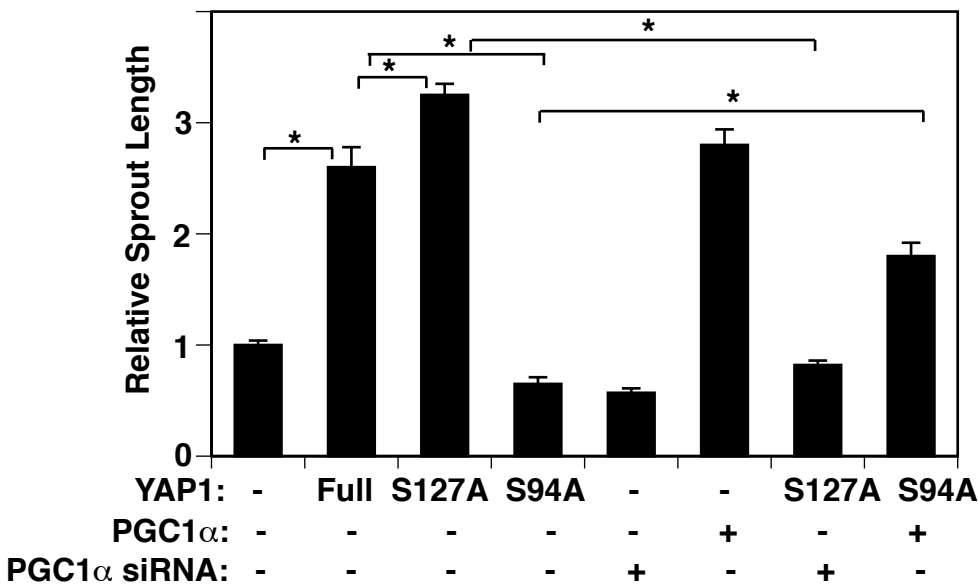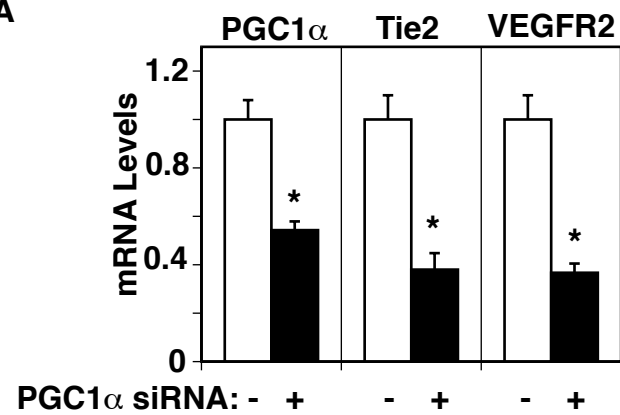**Fig. 4**



**A**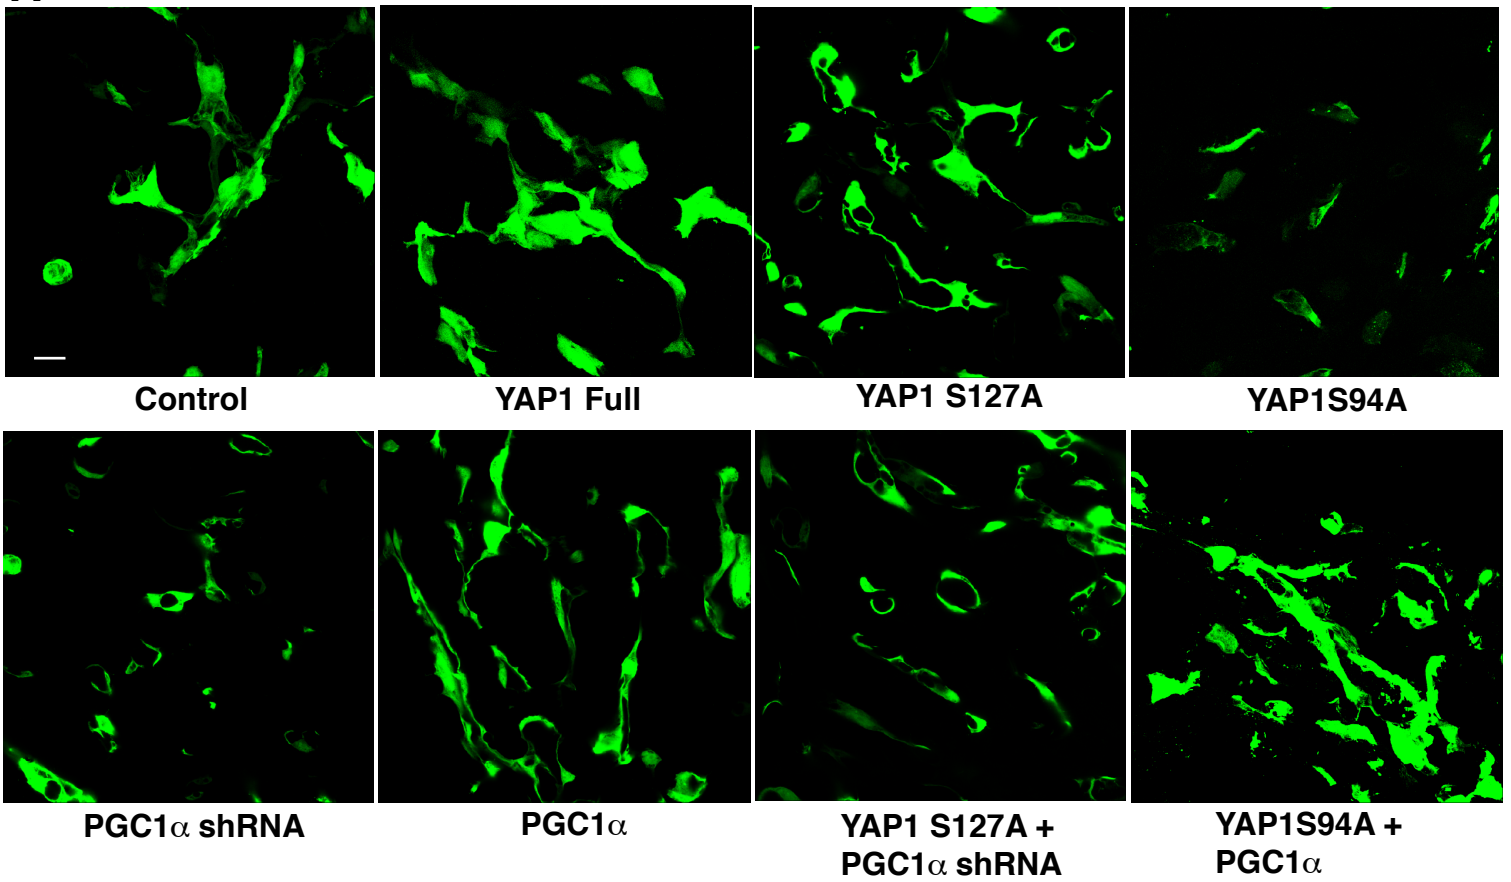**B**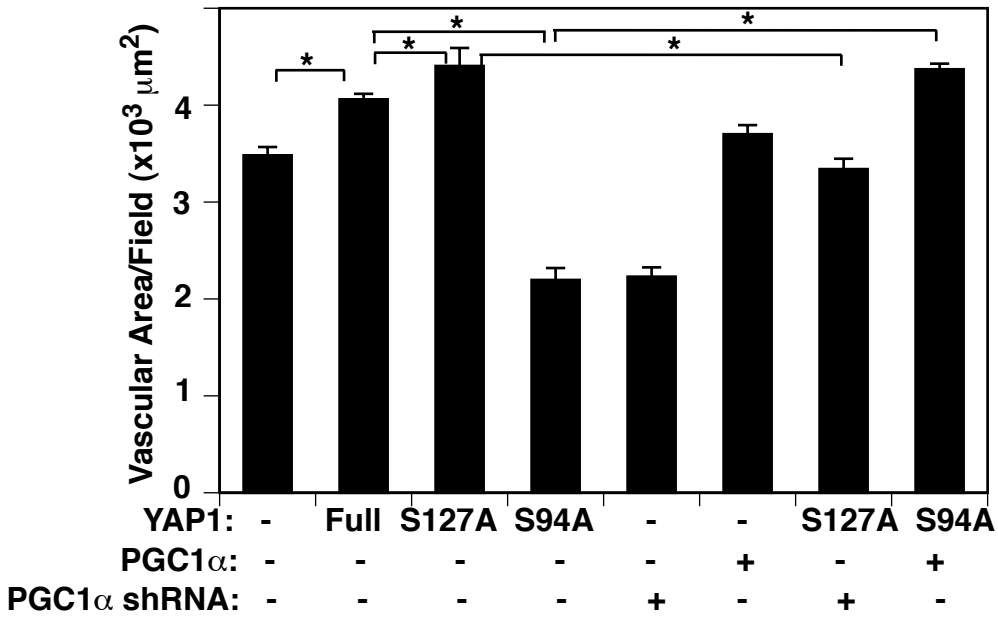

**A**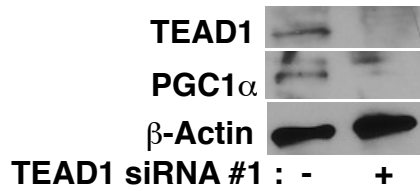**B**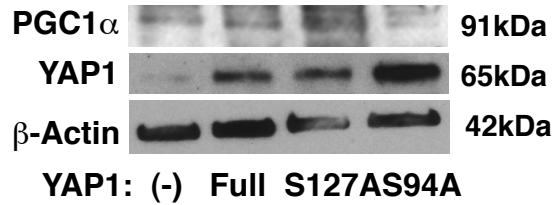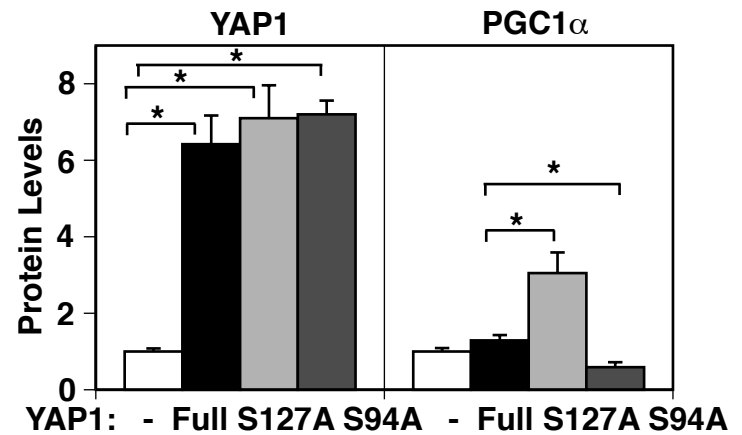

**Supplementary Fig. S1. YAP1-TEAD1 signaling controls expression of PGC1 $\alpha$  in HUVE cells.**

**A)** Immunoblots showing TEAD1, PGC1 $\alpha$ , and  $\beta$ -actin protein levels in HUVE cells treated with TEAD1 siRNA#1 or control siRNA with irrelevant sequences. **B)** Immunoblots showing PGC1 $\alpha$ , YAP1, and  $\beta$ -actin protein levels in HUVE cells treated with virus overexpressing full-length YAP1, YAP1S127A, YAP1S94A, or control vector alone (left). Graph showing YAP1 and PGC1 $\alpha$  protein levels normalized by  $\beta$ -actin protein levels in HUVE cells treated with full-length YAP1, YAP1S127A, YAP1S94A, or control vector alone (right, \*,  $p < 0.05$ ). Error bars represent s.e.m. of three independent experiments.

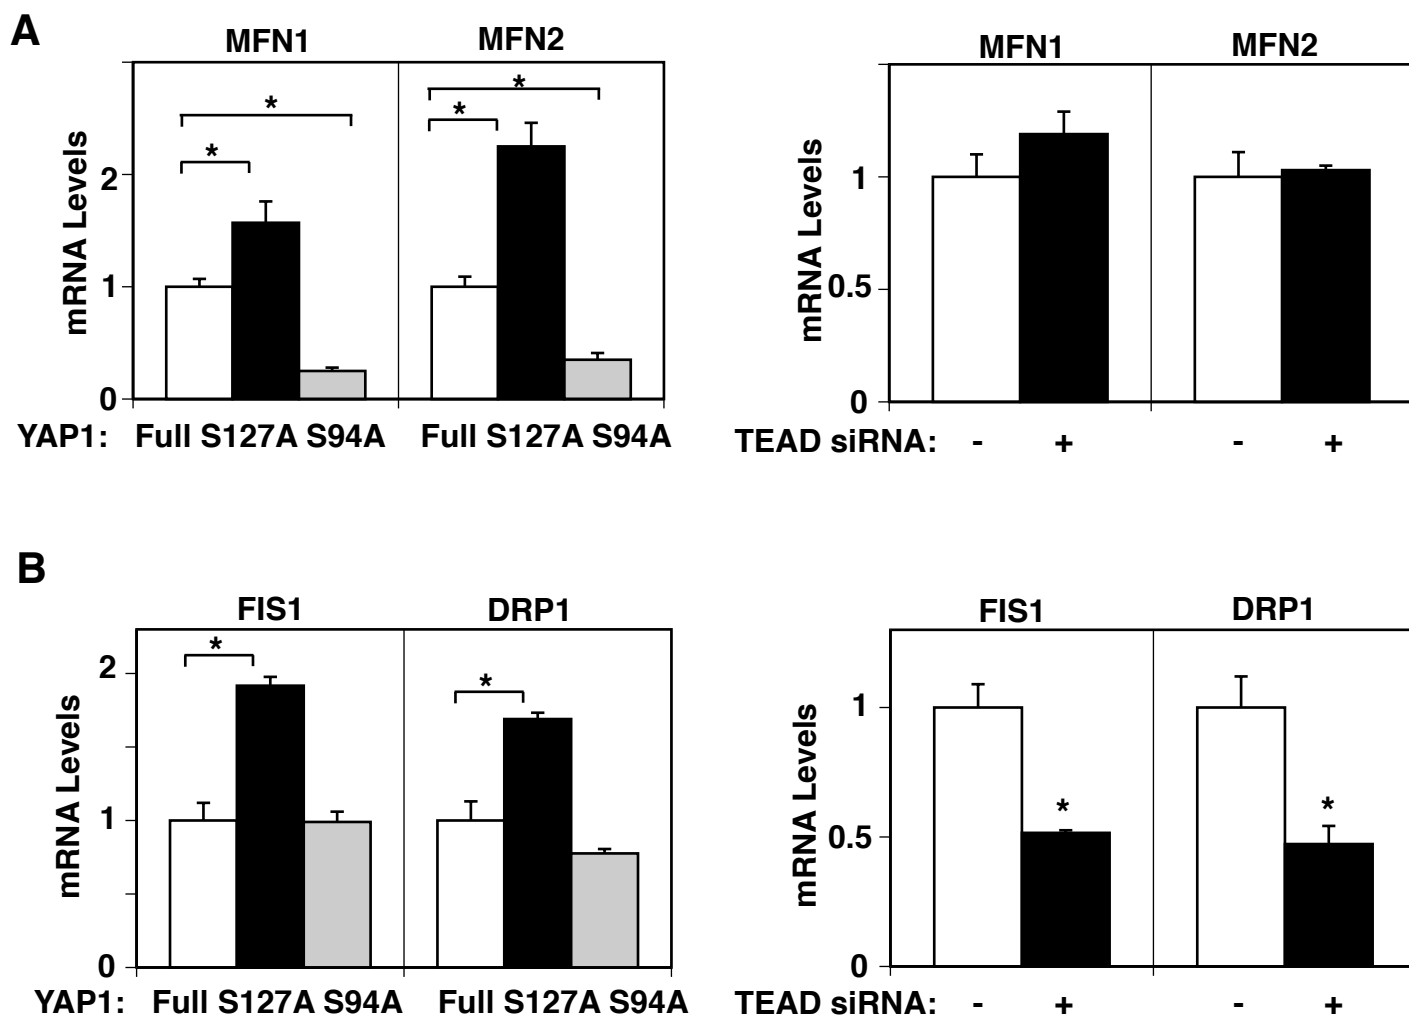

**Supplementary Fig. S2. YAP1-TEAD1 signaling controls mitochondrial dynamics.**

**A)** Graph showing MFN1 and MFN2 mRNA levels in HUVE cells overexpressing full-length YAP1, YAP1S127A, or YAP1S94A (left, \*,  $p < 0.05$ ). Graph showing MFN1 and MFN2 mRNA levels in HUVE cells treated with TEAD1 siRNA or control siRNA with irrelevant sequences (right, \*,  $p < 0.05$ ).

Error bars represent s.e.m. of three independent experiments. **B)** Graph showing FIS1 and DRP1 mRNA levels in HUVE cells overexpressing full-length YAP1, YAP1S127A, or YAP1S94A (left, \*,  $p < 0.05$ ).

Graph showing FIS1 and DRP1 mRNA levels in HUVE cells treated with TEAD1 siRNA or control siRNA with irrelevant sequences (right, \*,  $p < 0.05$ ). Error bars represent s.e.m. of three independent experiments.

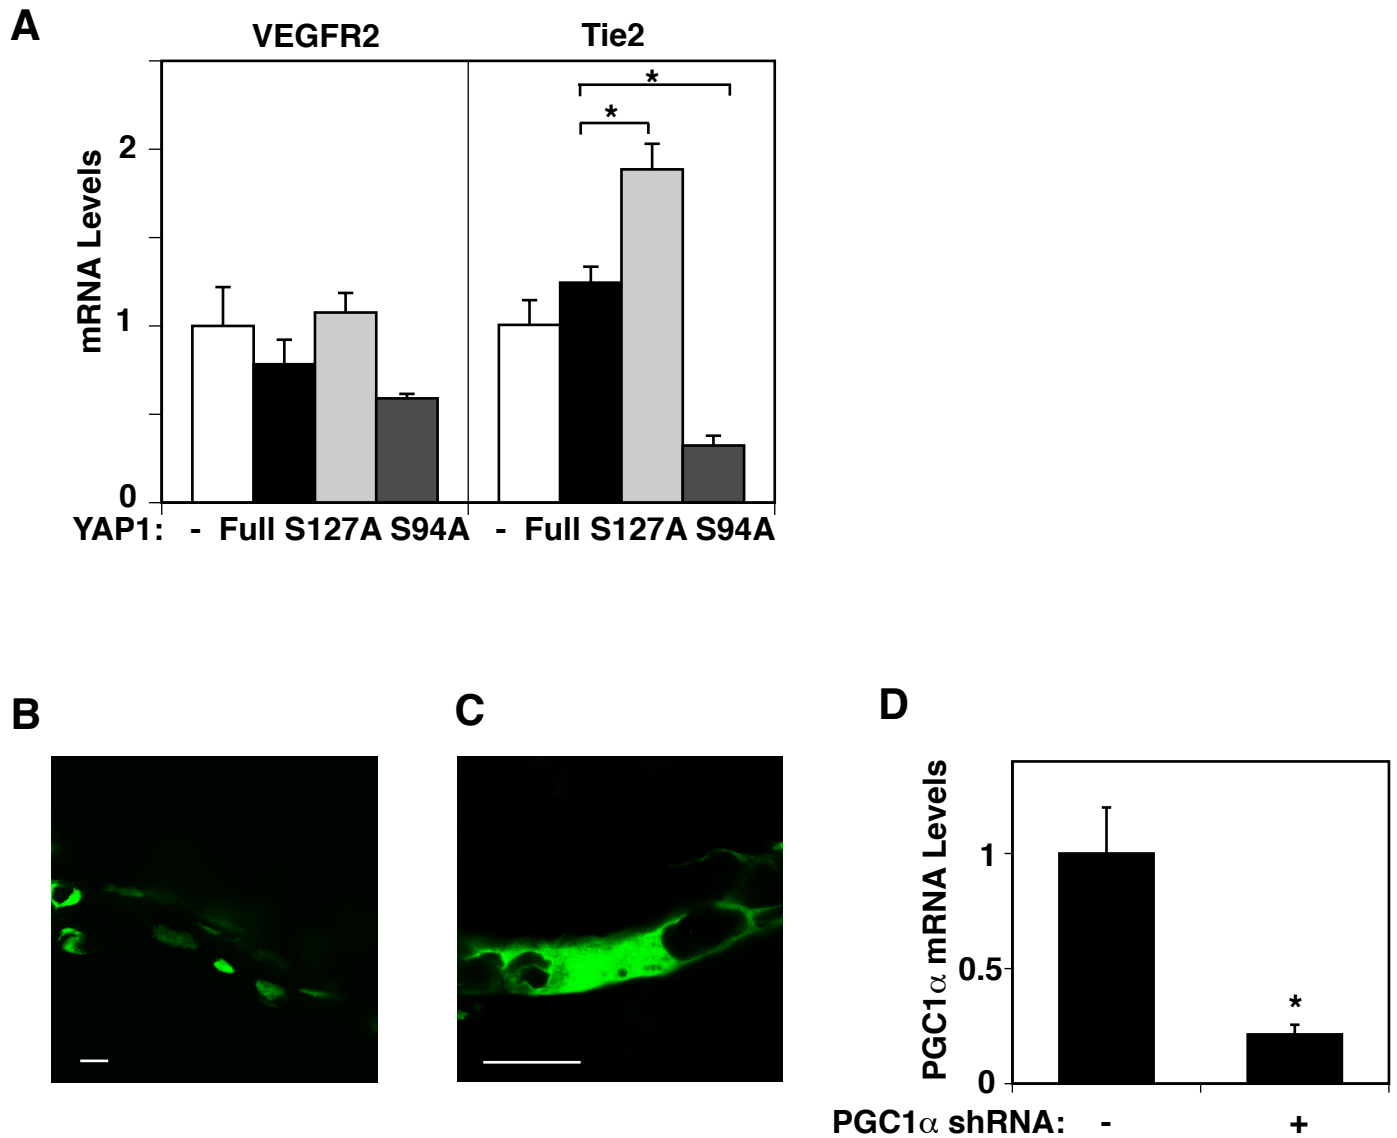

**Supplementary Fig. S3. YAP1-TEAD1 signaling controls expression of angiogenic factors in HUVE cells.**

**A)** Graph showing VEGFR2 and Tie2 mRNA levels in HUVE cells treated with virus overexpressing full-length YAP1, YAP1S127A, YAP1S94A or control vector (\*,  $p < 0.05$ ). Error bars represent s.e.m. of three independent experiments. **B)** IF micrograph of fibrin gel supplemented with GFP-labeled HUVE cells implanted on mouse lung for 1 day. Scale bar, 25  $\mu\text{m}$ . **C)** IF micrograph of GFP-labeled HUVE cells forming lumen structure in the fibrin gel implanted on mouse lung for 7 days. Scale bar, 25  $\mu\text{m}$ . **D)** Graph showing PGC1 $\alpha$  mRNA levels in HUVE cells treated with virus overexpressing PGC1 $\alpha$  shRNA or control vector (\*,  $p < 0.05$ ). Error bars represent s.e.m. of three independent experiments.
